# Supplementary material for: The motion after-effect: local and global contributions to contrast sensitivity
Source: PubMed Central journal article supplement (PMC2660997; doi:10.1098/rspb.2008.1932), 2009-02-25
Supplement: rspb20081932s02.pdf [file rspb20081932s02.pdf]

A) HS responses, 20% contrast

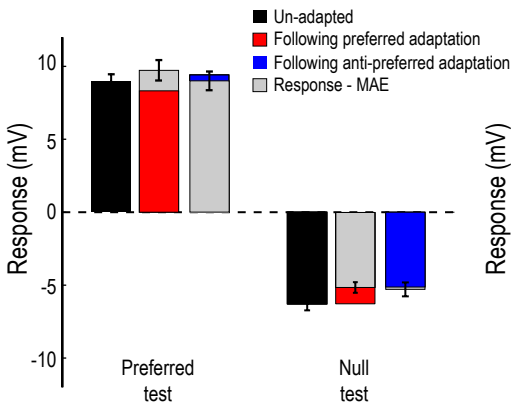

B) HS responses, 2% contrast

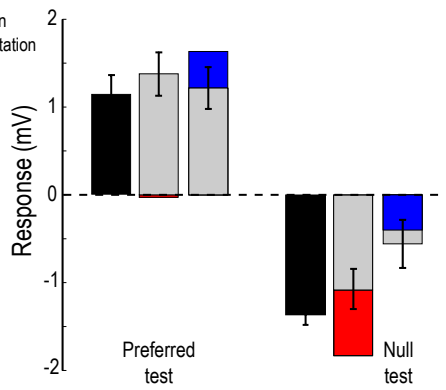

C) H1 responses, 30% contrast (after Neri & Laughlin 2005)

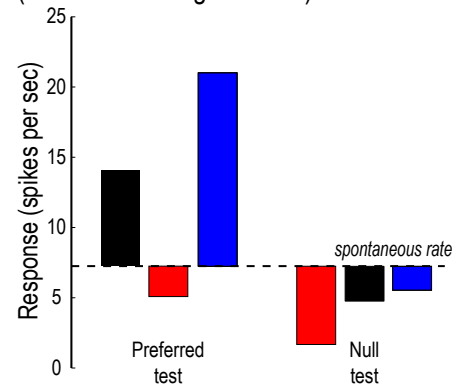

**Local adaptation in hoverfly HS cells compared to blowfly H1**

A) The graph on shows the un-adapted (black) responses to preferred (left) and anti-preferred (right) direction motion at a contrast of 20%. The adapted responses to the same contrasts are shown in red (following preferred direction adaptation) and blue (following anti-preferred direction adaptation). The grey bars show the same responses after subtracting the antagonistic after-potential measured at a test contrast of 0 (see Figure 2). The data (n = 15) is reproduced from Figure 2. B) The graph shows the un-adapted (black) responses to preferred (left) and anti-preferred (right) direction motion at a contrast of 2%. The adapted responses to the same contrasts are shown in red (following preferred direction adaptation) and blue (following anti-preferred direction adaptation). The grey bars show the same responses after subtracting the antagonistic after-potential measured at a test contrast of 0 (see Figure 2). The data (n = 15) is reproduced from Figure 2. C) The graph shows results from Neri & Laughlin (2005) with H1 un-adapted (black) responses to preferred (left) and anti-preferred (right) direction motion at a contrast of 30%. The adapted responses to the same directions are shown in red (following preferred direction adaptation) and blue (following anti-preferred direction adaptation). The data is reproduced from Figure 1E in Neri & Laughlin, 2005.
